# Supplementary material for: Impact of anticancer chemotherapy on the extension of beta-lactamase spectrum: an example with KPC-type carbapenemase activity towards ceftazidime-avibactam
Source: PubMed Central journal article supplement (PMC6969056; doi:10.1038/s41598-020-57505-w), 2020-01-17
Supplement: 41598_2020_57505_MOESM1_ESM.pdf [file 41598_2020_57505_MOESM1_ESM.pdf]

1 **Impact of anticancer chemotherapy on the extension of beta-lactamase spectrum: an example with KPC-type carbapenemase activity**  
2 **towards ceftazidime-avibactam**

3

4 *Authors:* Claire Amaris Hobson<sup>1</sup>, Stéphane Bonacorsi<sup>1,2</sup>, Didier Hocquet<sup>3</sup>, André Baruchel<sup>4</sup>, Mony Fahd<sup>4</sup>, Thomas Storme<sup>5</sup>, Raksamy Tang<sup>5</sup>,  
5 Catherine Doit<sup>1,2</sup>, Olivier Tenaillon<sup>1</sup>, André Birgy<sup>1,2\*</sup>.

6 <sup>1</sup>Université de Paris, IAME, INSERM, F-75018 Paris, France

7 <sup>2</sup>AP-HP, Hôpital Robert Debré, Service de Microbiologie, F-75019 Paris, France

8 <sup>3</sup>Hygiène Hospitalière, UMR CNRS 6249, Université de Bourgogne Franche-Comté, Besançon, France

9 <sup>4</sup>Service d'Immuno-Hématologie Pédiatrique, Hôpital Robert Debré, AP-HP, Paris, France

10 <sup>5</sup>Pharmacie Hospitalière, Hôpital Robert Debré, AP-HP, Paris, France

11

12

13 **\*Corresponding author:** André Birgy (AB), PD, PhD, Hôpital Robert-Debré (APHP), 48 Boulevard Sérurier F75019 Paris, France

14 ([andre.birgy@aphp.fr](mailto:andre.birgy@aphp.fr)). Phone +33 140034060

15

16 **Supplementary Table S1:**

17 Rates, average and standard deviation (sd) of resistant mutants of 2 strains of KPC-producing *Enterobacteriaceae* (RD26 and RD29) selected on  
 18 4 different antibiotic media (Ceftazidime/avibactam (CZA), Rifampicin (RMP), Meropenem (Mero) and the association Ceftazidime/avibactam  
 19 and Meropenem (CZA-Mero)) after a culture with or without chemotherapy.

| Resistance mutational rates to different antibiotics after exposure to cytotoxic molecules or non exposure (control) |                        |                            |                          |                            |                          |                            |                          |                            |                          |                            |                          |                            |                          |                            |                          |                            |                |         |
|----------------------------------------------------------------------------------------------------------------------|------------------------|----------------------------|--------------------------|----------------------------|--------------------------|----------------------------|--------------------------|----------------------------|--------------------------|----------------------------|--------------------------|----------------------------|--------------------------|----------------------------|--------------------------|----------------------------|----------------|---------|
| Isolate                                                                                                              | Selective plate medium | Cytarabine                 |                          | Mercaptopurine             |                          | Azacitidine                |                          | Daunorubicin               |                          | Dacarbazine                |                          | Cyclophosphamide           |                          | Mitoxantrone               |                          | Control                    |                |         |
|                                                                                                                      |                        | Resistant mutational rates | average +/- sd (p-value) | Resistant mutational rates | average +/- sd (p-value) | Resistant mutational rates | average +/- sd (p-value) | Resistant mutational rates | average +/- sd (p-value) | Resistant mutational rates | average +/- sd (p-value) | Resistant mutational rates | average +/- sd (p-value) | Resistant mutational rates | average +/- sd (p-value) | Resistant mutational rates | average +/- sd |         |
| <i>E. coli</i><br>KPC-2 (RD29)                                                                                       | CZA 2mg/L              | 1,0E-06                    |                          | <1E-10                     |                          | <1E-10                     |                          | 1.5E-07                    |                          | 3.4E-06                    |                          | <1E-10                     |                          | 4.5E-08                    |                          | 4.0E-10                    |                |         |
|                                                                                                                      |                        | 1.7E-08                    | 2.7E-07 +/-              |                            | 7.7E-09 +/-              | 1.9E-08                    | 4.7E-09 +/-              |                            | 8.3E-08 +/-              | 1.3E-06                    | 3.3E-06 +/-              |                            | 2.6E-08 +/-              | 3.0E-08                    | 9.3E-08 +/-              | 1.2E-09                    | 9.4E-09 +/-    |         |
|                                                                                                                      |                        | 3.7E-08                    | (0.15)                   | 3.1E-08                    | 1.5E-08                  | 1.0E-10                    | (0.94)                   | 1.0E-10                    | 9.2E-09                  | 9.7E-08                    | 6.1E-06                  | 2.1E-06                    | 1.6E-08                  | 4.0E-08                    | 8.3E-08                  | 8.2E-08                    | 1.6E-09        | 1.6E-08 |
|                                                                                                                      |                        | 1.4E-08                    |                          | 1.0E-10                    |                          | 1.0E-10                    |                          | 1.8E-07                    |                          | 2.4E-06                    |                          | 8.6E-08                    |                          | 2.1E-07                    |                          | 5.5E-09                    |                |         |
|                                                                                                                      | RMP 50mg/L             | 1.5E-08                    |                          | 4.5E-08                    |                          | 3.7E-06                    |                          | 3.0E-07                    |                          | 1.8E-05                    |                          | 3.9E-08                    |                          | 6.5E-08                    |                          | 1.6E-08                    |                |         |
|                                                                                                                      |                        | 4.1E-08                    | 2.0E-08 +/-              |                            | 4.2E-08 +/-              | 1.9E-06                    | 2.3E-06 +/-              |                            | 5.8E-06 +/-              | 1.7E-05                    | 1.6E-04 +/-              |                            | 3.8E-08 +/-              | 1.0E-07                    | 5.6E-08 +/-              | 6.0E-08                    | 3.2E-08 +/-    |         |
| 6.2E-09                                                                                                              |                        | 1.5E-08                    | 6.1E-08                  | 1.6E-08                    | 1.4E-06                  | 1.0E-06                    | 4.0E-06                  | 6.9E-06                    | 5.9E-04                  | 2.9E-04                    | 2.6E-08                  | 2.5E-08                    | 5.0E-08                  | 3.8E-08                    | 5.5E-08                  | 2.3E-08                    |                |         |
|                                                                                                                      |                        | 1.9E-08                    |                          | 2.3E-08                    |                          | 2.4E-06                    |                          | 1.6E-05                    |                          | 6.7E-06                    |                          | 7.1E-08                    |                          | 8.1E-09                    |                          | 1.8E-08                    |                |         |
| <i>E. cloacae</i><br>KPC-3 (RD26)                                                                                    | CZA 16mg/L             | 3.2E-09                    |                          | 2.1E-08                    |                          | 3.7E-07                    |                          | 1.3E-08                    |                          | 1.2E-07                    |                          | 1.1E-08                    |                          | 3.6E-08                    |                          | 6.1E-09                    |                |         |
|                                                                                                                      |                        | 7.2E-09                    | 6.2E-09 +/-              |                            | 2.4E-08 +/-              | 3.8E-07                    | 7.2E-07 +/-              |                            | 1.7E-07 +/-              | 7.0E-08                    | 9.6E-08 +/-              |                            | 7.6E-09 +/-              | 7.1E-08                    | 3.6E-08 +/-              | 5.9E-10                    | 4.1E-09 +/-    |         |
|                                                                                                                      |                        | 9.8E-09                    | 2.9E-09                  | 3.7E-08                    | 1.1E-08                  | 1.1E-06                    | 4.0E-07                  | 2.8E-08                    | 1.8E-07                  | 3.0E-08                    | 5.9E-08                  | 3.9E-09                    | 2.9E-09                  | 1.7E-08                    | 2.5E-08                  | 2.6E-10                    | 5.2E-09        |         |
|                                                                                                                      |                        |                            | 4.6E-09                  |                            | 2.8E-08                  |                            | 1.0E-06                  |                            | 4.0E-07                  |                            | 1.7E-07                  |                            | 8.2E-09                  |                            | 1.9E-08                  |                            | 1.1E-09        |         |
|                                                                                                                      | RMP 50mg/L             | 4.4E-08                    |                          | 2.5E-07                    |                          | 1.6E-06                    |                          | 1.3E-07                    |                          | 2.5E-06                    |                          | 2.5E-07                    |                          | 1.1E-07                    |                          | 7.6E-08                    |                |         |
|                                                                                                                      |                        | 6.9E-08                    | 4.2E-08 +/-              |                            | 9.5E-08 +/-              | 4.0E-06                    | 3.0E-06 +/-              |                            | 1.3E-06 +/-              | 3.6E-07                    | 8.5E-07 +/-              |                            | 1.4E-07 +/-              | 1.5E-07                    | 1.2E-07 +/-              | 1.1E-07                    | 7.3E-08 +/-    |         |
|                                                                                                                      |                        | 2.5E-08                    | 1.9E-08                  | 3.7E-08                    | 1.0E-07                  | 2.4E-06                    | 1.2E-06                  | 2.5E-07                    | 1.5E-06                  | 1.8E-07                    | 1.1E-06                  | 4.7E-08                    | 9.8E-08                  | 1.7E-07                    | 4.8E-08                  | 6.3E-08                    | 2.1E-08        |         |
|                                                                                                                      |                        |                            | 3.2E-08                  |                            | 5.0E-08                  |                            | 4.1E-06                  |                            | 1.4E-06                  |                            | 3.1E-07                  |                            | 2.0E-07                  |                            | 5.8E-08                  |                            | 4.8E-08        |         |
|                                                                                                                      | MEM 20mg/L             | *                          | *                        | *                          | *                        | *                          | *                        | *                          | *                        | *                          | *                        | *                          | *                        | *                          | *                        | *                          | *              |         |
|                                                                                                                      | CZA-MEM                | <1E-10                     | 0                        | <1E-10                     | 0                        | <1E-10                     | 0                        | <1E-10                     | 0                        | <1E-10                     | 0                        | <1E-10                     | 0                        | <1E-10                     | 0                        | <1E-10                     | 0              |         |
| <1E-10                                                                                                               |                        | 0                          | <1E-10                   | 0                          | <1E-10                   | 0                          | <1E-10                   | 0                          | <1E-10                   | 0                          | <1E-10                   | 0                          | <1E-10                   | 0                          | <1E-10                   | 0                          |                |         |

\*Resistant rates were not evaluable since confluent growths were observed at this concentration

20

21

22

23

24 **Supplementary Table S2:**

25 Fold increase of resistant mutants' rates, average and standard deviation (sd) of 2 strains of KPC-producing *Enterobacteriaceae* (RD26 and  
 26 RD29) selected on 4 different antibiotic media (Ceftazidime/avibactam (CZA), Rifampicin (RMP), Meropenem (Mero) and the association  
 27 Ceftazidime/avibactam and Meropenem (CZA-Mero)) after a culture with or without chemotherapy, compared to the control group.

| Fold increased <sup>1</sup> of resistant mutant rates to different antibiotics after exposure to different cytotoxics |                        |               |                |                |                |               |                |               |                 |               |                |                  |                |               |                |
|-----------------------------------------------------------------------------------------------------------------------|------------------------|---------------|----------------|----------------|----------------|---------------|----------------|---------------|-----------------|---------------|----------------|------------------|----------------|---------------|----------------|
| Isolates                                                                                                              | Selective Plate medium | Cytarabine    |                | Mercaptopurine |                | Azacitidine   |                | Daunorubicin  |                 | Dacarbazine   |                | Cyclophosphamide |                | Mitoxantrone  |                |
|                                                                                                                       |                        | fold increase | average +/- sd | fold increase  | average +/- sd | fold increase | average +/- sd | fold increase | average +/- sd  | fold increase | average +/- sd | fold increase    | average +/- sd | fold increase | average +/- sd |
| <i>E. coli</i> KPC-2 (RD29)                                                                                           | CZA 2mg/L              | 2490.0        |                | 0.0            |                | 0.0           |                | 373.5         |                 | 8479.5        |                | 0.0              |                | 113.2         |                |
|                                                                                                                       |                        | 14.5          | 632.4 +/-      | 18.7           | 4.7 +/- 9.3    | 15.4          | 3.8 +/- 7.7    | 0.0           | 101.7 +/- 181.8 | 1051.3        | 3416.2 +/-     | 9.6              | 6.4 +/- 7.7    | 25.2          | 57.0 +/- 38.9  |
|                                                                                                                       |                        | 22.6          | 1238.4         | 0.0            |                | 0.0           |                | 0.0           |                 | 3700.7        | 3660.9         | 0.1              |                | 50.8          |                |
|                                                                                                                       | RMP 50mg/L             | 2.6           |                | 0.0            |                | 0.0           |                | 33.3          |                 | 433.3         |                | 15.7             |                | 38.8          |                |
|                                                                                                                       |                        | 41.5          |                | 2.8            |                | 230.1         |                | 18.7          |                 | 1103.7        |                | 2.5              |                | 4.0           |                |
|                                                                                                                       |                        | 0.7           | 10.8 +/- 20.4  | 1.1            | 2.1 +/- 1.1    | 31.0          | 105.2 +/- 97.3 | 73.2          | 309.1 +/- 389.8 | 288.3         | 3134.2 +/-     | 0.5              | 2.1 +/- 1.5    | 1.7           | 1.8 +/- 1.6    |
|                                                                                                                       |                        | 0.1           |                | 3.4            |                | 25.0          |                | 274.5         |                 | 10775.0       | 5107.0         | 1.2              |                | 0.9           |                |
|                                                                                                                       |                        | 1.0           |                | 1.3            |                | 134.7         |                | 870.0         |                 | 370.0         |                | 3.9              |                | 0.4           |                |
| <i>E. cloacae</i> KPC-3 (RD26)                                                                                        | CZA 16mg/L             | 0.5           |                | 3.5            |                | 60.5          |                | 2.1           |                 | 19.4          |                | 1.8              |                | 6.0           |                |
|                                                                                                                       |                        | 12.2          | 13.6 +/- 16.6  | 142.0          | 43.0 +/- 66.9  | 650.0         | 1492.5 +/-     | 107.6         | 125.2 +/- 170.9 | 118.8         | 102.2 +/- 58.0 | 14.8             | 6.2 +/- 6.5    | 119.8         | 52.1 +/- 51.7  |
|                                                                                                                       |                        | 37.5          |                | 0.8            |                | 4329.3        | 1925.6         | 19.1          |                 | 115.8         |                | 0.6              |                | 64.7          |                |
|                                                                                                                       | MEM 20mg/L             | 4.3           |                | 25.8           |                | 930.0         |                | 372.0         |                 | 155.0         |                | 7.6              |                | 18.0          |                |
|                                                                                                                       |                        | *             |                | *              |                | *             |                | *             |                 | *             |                | *                |                | *             |                |
|                                                                                                                       |                        | *             |                | *              |                | *             |                | *             |                 | *             |                | *                |                | *             |                |
|                                                                                                                       |                        | 0.6           |                | 3.3            |                | 21.2          |                | 1.7           |                 | 33.6          |                | 3.3              |                | 1.4           |                |
|                                                                                                                       |                        | 0.6           | 0.6 +/- 0.1    | 0.6            | 1.4 +/- 1.3    | 37.4          | 45.4 +/- 27.1  | 4.0           | 20.4 +/- 21.5   | 3.3           | 11.6 +/- 14.7  | 0.7              | 2.3 +/- 1.7    | 1.4           | 1.7 +/- 0.6    |
| RMP 50mg/L                                                                                                            | 0.4                    |               | 0.7            |                | 38.7           |               | 46.9           |               | 2.9             |               | 1.0            |                  | 2.6            |               |                |
|                                                                                                                       | 0.7                    |               | 1.0            |                | 84.2           |               | 28.9           |               | 6.4             |               | 4.2            |                  | 1.2            |               |                |

<sup>1</sup>Four experiments were performed for each antibiotics

\*Resistant rates were not evaluable since confluent growths were observed at this concentration

28

29

30

31

32

33 **Supplementary Table S3:**

34 Rates, average and standard deviation (sd) of resistant mutants of 5 strains of KPC-producing *Enterobacteriaceae* selected on 2 different  
 35 antibiotic media (Ceftazidime/avibactam (CZA), Rifampicin (RMP), after a culture with or without chemotherapy.

|      | Mutation rate on RMP medium |                          |                      |                          | Mutation rate on CZA medium |                          |                      |                          |
|------|-----------------------------|--------------------------|----------------------|--------------------------|-----------------------------|--------------------------|----------------------|--------------------------|
|      | with chemotherapy           | average +/- sd (p-value) | without chemotherapy | average +/- sd (p-value) | with chemotherapy           | average +/- sd (p-value) | without chemotherapy | average +/- sd (p-value) |
| RD27 | 3.66E-07                    |                          | 2.62E-08             |                          | 6.21E-08                    |                          | 3.28E-10             |                          |
|      | 4.56E-07                    | 4.97E-07 +/-             | 1.32E-08             | 2.32E-08 +/-             | 1.32E-07                    | 1.74E-07 +/-             | 2.63E-10             | 3.61E-10 +/-             |
|      | 5.05E-07                    | 1.47E-07                 | 5.26E-08             | 1.79E-08                 | 1.29E-07                    | 1.48E-07                 | 4.39E-10             | 7.39E-11                 |
|      | 7.43E-07                    | <b>(&lt;0.01)</b>        | 1.72E-08             |                          | 4.34E-07                    | <b>(&lt;0.01)</b>        | 4.31E-10             |                          |
|      | 4.15E-07                    |                          | 6.90E-09             |                          | 1.12E-07                    |                          | 3.45E-10             |                          |
| DD34 | 4.85E-07                    |                          | 1.36E-08             |                          | 1.29E-07                    |                          | 2.71E-10             |                          |
|      | 3.51E-07                    | 3.98E-07 +/-             | 1.01E-08             | 1.14E-08 +/-             | 1.70E-07                    | 2.15E-07 +/-             | 2.53E-10             | 2.96E-09 +/-             |
|      | 4.31E-07                    | 6.87E-08                 | 4.74E-09             | 4.50E-09                 | 5.38E-07                    | 1.96E-07                 | 7.11E-09             | 3.63E-09                 |
|      | 4.11E-07                    | <b>(&lt;0.01)</b>        | 1.69E-08             |                          | 2.24E-07                    | <b>(&lt;0.01)</b>        | 6.76E-09             |                          |
|      | 3.10E-07                    |                          | 1.19E-08             |                          | 1.63E-08                    |                          | 3.97E-10             |                          |
| DD36 | 1.13E-05                    |                          | 7.96E-07             |                          | 6.71E-06                    |                          | 3.12E-07             |                          |
|      | 7.16E-06                    | 1.99E-05 +/-             | 5.98E-07             | 6.11E-07 +/-             | 5.39E-06                    | 4.68E-06 +/-             | 1.86E-07             | 1.99E-07 +/-             |
|      | 6.79E-05                    | 2.70E-05                 | 5.70E-07             | 1.07E-07                 | 3.49E-06                    | 1.76E-06                 | 9.00E-08             | 1.04E-07                 |
|      | 3.95E-06                    | <b>(&lt;0.01)</b>        | 5.27E-07             |                          | 2.30E-06                    | <b>(&lt;0.01)</b>        | 3.01E-07             |                          |
|      | 8.98E-06                    |                          | 5.62E-07             |                          | 5.52E-06                    |                          | 1.07E-07             |                          |
| DD37 | 4.69E-07                    |                          | 1.63E-08             |                          | 8.97E-08                    |                          | 2.72E-10             |                          |
|      | 1.37E-06                    | 1.29E-06 +/-             | 4.03E-09             | 8.43E-09 +/-             | 3.17E-08                    | 5.47E-08 +/-             | 4.03E-10             | 3.51E-10 +/-             |
|      | 3.40E-06                    | 1.24E-06                 | 1.20E-08             | 5.50E-09                 | 1.04E-07                    | 3.89E-08                 | 3.98E-10             | 5.87E-11                 |
|      | 4.30E-07                    | <b>(&lt;0.01)</b>        | 3.75E-09             |                          | 2.65E-08                    | <b>(&lt;0.01)</b>        | 3.75E-10             |                          |
|      | 7.61E-07                    |                          | 6.13E-09             |                          | 2.17E-08                    |                          | 3.07E-10             |                          |
| DD38 | 4.54E-07                    |                          | 8.38E-09             |                          | 3.21E-08                    |                          | 2.79E-10             |                          |
|      | 7.64E-07                    | 8.04E-07 +/-             | 1.60E-08             | 1.77E-08 +/-             | 1.39E-08                    | 1.81E-08 +/-             | 2.67E-09             | 7.55E-10 +/-             |
|      | 1.57E-06                    | 4.44E-07                 | 3.36E-08             | 1.05E-08                 | 1.70E-08                    | 8.53E-09                 | 2.58E-10             | 1.07E-09                 |
|      | 6.76E-07                    | <b>(&lt;0.01)</b>        | 8.72E-09             |                          | 1.80E-08                    | <b>(&lt;0.01)</b>        | 2.91E-10             |                          |
|      | 5.57E-07                    |                          | 2.17E-08             |                          | 9.43E-09                    |                          | 2.71E-10             |                          |

36

37

38 **Supplementary Table S4:**

39 Genome sequencing and analysis: identification of the beta-lactamases genes, sequence types and quality of the sequencing data illustrated by  
 40 the mean N50 (bp), mean coverage and number of contigs.

| Isolates    | Genome_size | Number of contigs | n50    | Coverage | Species                      | m1st   | beta-lactamases genes                         |
|-------------|-------------|-------------------|--------|----------|------------------------------|--------|-----------------------------------------------|
| <b>RD26</b> | 5020989     | 75                | 302644 | 101      | <i>E. cloacae</i>            | -      | blaKPC-3,blaOXA-9,blaTEM-1A                   |
| <b>RD29</b> | 4980967     | 90                | 309405 | 84       | <i>Escherichia coli</i>      | ST-131 | blaKPC-2,blaTEM-1B                            |
| <b>RD27</b> | 5542544     | 88                | 248804 | 80       | <i>Klebsiella pneumoniae</i> | ST-512 | blaKPC-3,blaOXA-9,blaSHV-11,blaTEM-1A         |
| <b>DD34</b> | 5619986     | 120               | 233237 | 72       | <i>Klebsiella pneumoniae</i> | ST-258 | blaKPC-2,blaOXA-9,blaSHV-12,blaTEM-1A         |
| <b>DD36</b> | 5747097     | 153               | 186314 | 75       | <i>Klebsiella pneumoniae</i> | ST-11  | blaKPC-2,blaSHV-11,blaTEM-1B                  |
| <b>DD37</b> | 5710690     | 148               | 342058 | 75       | <i>Klebsiella pneumoniae</i> | ST-101 | blaKPC-2,blaOXA-1,blaOXA-9,blaSHV-1,blaTEM-1A |
| <b>DD38</b> | 5579702     | 96                | 236649 | 106      | <i>Klebsiella pneumoniae</i> | ST-307 | blaKPC-3,blaOXA-9,blaSHV-28,blaTEM-1A         |

41

42

43

44 **Supplementary Table S5:**

45 Relative quantification of *bla*<sub>KPC</sub> expression using transcription analysis by RT-qPCR of recombinant strains (*E. coli* Top10 with pBR322 harboring  
46 either wild-type allele (KPC-3) or alleles conferring ceftazidime-avibactam resistance. *dinB* a chromosomal housekeeping gene and *tetA* a  
47 pBR322 plasmid gene (coding for tetracyclin resistance) were used for normalization.

48

| Isolates                      | Replicates | Ct*<br><i>blaKPC</i> | mean<br>Ct* KPC | Ct* <i>dinB</i> | mean<br>Ct* <i>dinB</i> | Ct* <i>tetA</i> | mean<br>Ct* <i>tetA</i> | Ct* <i>blaKPC</i> -<br>Ct*<br>chromosomal<br>internal<br>control | Ct* <i>blaKPC</i> -<br>Ct* plasmidic<br>internal<br>control | delta delta Ct*<br>chromosomal<br>control | delta delta<br>Ct* plasmidic<br>control | Fold change<br>compared to<br>RD26<br>(chromosomal<br>control) | Fold change<br>compared to<br>RD26<br>(plasmidic<br>control) |
|-------------------------------|------------|----------------------|-----------------|-----------------|-------------------------|-----------------|-------------------------|------------------------------------------------------------------|-------------------------------------------------------------|-------------------------------------------|-----------------------------------------|----------------------------------------------------------------|--------------------------------------------------------------|
| Top10-pBR322-<br>RD26 (KPC-3) | 1          | 16.74                |                 | 29.9            |                         | 19.8            |                         |                                                                  |                                                             |                                           |                                         |                                                                |                                                              |
|                               | 2          | 16.84                | 16.77           | 29.47           | 29.4                    | 19.82           | 19.8                    | -12.6                                                            | -3.04                                                       | -                                         | -                                       | -                                                              | -                                                            |
|                               | 3          | 16.73                |                 | 28.71           |                         | 19.81           |                         |                                                                  |                                                             |                                           |                                         |                                                                |                                                              |
| Top10-pBR322-<br>RD26-7       | 1          | 16.5                 |                 | 29.18           |                         | 19.94           |                         |                                                                  |                                                             |                                           |                                         |                                                                |                                                              |
|                               | 2          | 16.72                | 16.61           | 29.2            | 29.2                    | 19.91           | 19.9                    | -12.6                                                            | -3.3                                                        | 0.0                                       | -0.3                                    | 1.0                                                            | 1.2                                                          |
|                               | 3          | 16.6                 |                 | 29.27           |                         | 19.85           |                         |                                                                  |                                                             |                                           |                                         |                                                                |                                                              |
| Top10-pBR322-<br>RD26-1       | 1          | 17                   |                 | 29.8            |                         | 20.48           |                         |                                                                  |                                                             |                                           |                                         |                                                                |                                                              |
|                               | 2          | 17.01                | 17,0            | 29.72           | 29.7                    | 20.43           | 20.4                    | -12.7                                                            | -3.4                                                        | -0.1                                      | -0.4                                    | 1.1                                                            | 1.3                                                          |
|                               | 3          | 16.95                |                 | 29.61           |                         | 20.33           |                         |                                                                  |                                                             |                                           |                                         |                                                                |                                                              |
| Top10-pBR322-<br>RD26-3       | 1          | 16.68                |                 | 29.62           |                         | 20.11           |                         |                                                                  |                                                             |                                           |                                         |                                                                |                                                              |
|                               | 2          | 16.77                | 16.76           | 29.82           | 29.7                    | 20.04           | 20.0                    | -13.0                                                            | -3.3                                                        | -0.4                                      | -0.2                                    | 1.3                                                            | 1.2                                                          |
|                               | 3          | 16.81                |                 | 29.68           |                         | 19.93           |                         |                                                                  |                                                             |                                           |                                         |                                                                |                                                              |
| Top10-pBR322-<br>RD26-6       | 1          | 16.78                |                 | 29.49           |                         | 20.19           |                         |                                                                  |                                                             |                                           |                                         |                                                                |                                                              |
|                               | 2          | 16.89                | 16.8            | 29.62           | 29.6                    | 20.07           | 20.1                    | -12.7                                                            | -3.3                                                        | -0.1                                      | -0.2                                    | 1.1                                                            | 1.2                                                          |
|                               | 3          | 16.85                |                 | 29.55           |                         | 20.07           |                         |                                                                  |                                                             |                                           |                                         |                                                                |                                                              |
| Top10-pBR322-<br>RD26-8       | 1          | 16.59                |                 | 29.58           |                         | 19.87           |                         |                                                                  |                                                             |                                           |                                         |                                                                |                                                              |
|                               | 2          | 16.6                 | 16.6            | 29.67           | 29.6                    | 19.98           | 19.9                    | -13.0                                                            | -3.3                                                        | -0.4                                      | -0.3                                    | 1.3                                                            | 1.2                                                          |
|                               | 3          | 16.55                |                 | 29.59           |                         | 19.79           |                         |                                                                  |                                                             |                                           |                                         |                                                                |                                                              |
| Top10-pBR322-<br>RD26-5       | 1          | 15.8                 |                 | 28.12           |                         | 18.24           |                         |                                                                  |                                                             |                                           |                                         |                                                                |                                                              |
|                               | 2          | 15.86                | 15.8            | 28.17           | 28.1                    | 18.26           | 18.3                    | -12.2                                                            | -2.4                                                        | 0.4                                       | 0.6                                     | 0.8                                                            | 0.7                                                          |
|                               | 3          | 15.88                |                 | 27.94           |                         | 18.31           |                         |                                                                  |                                                             |                                           |                                         |                                                                |                                                              |
| Top10-pBR322-<br>RD26-9       | 1          | 16.7                 |                 | 29.91           |                         | 20              |                         |                                                                  |                                                             |                                           |                                         |                                                                |                                                              |
|                               | 2          | 16.72                | 16.7            | 29.68           | 29.7                    | 19.98           | 20.0                    | -13.0                                                            | -3.3                                                        | -0.4                                      | -0.2                                    | 1.3                                                            | 1.2                                                          |
|                               | 3          | 16.74                |                 | 29.53           |                         | 20.03           |                         |                                                                  |                                                             |                                           |                                         |                                                                |                                                              |
| negative control              | 1          | 39.57                | -               | 38.62           | -                       | 32.87           | -                       | -                                                                | -                                                           | -                                         | -                                       | -                                                              | -                                                            |

\* Ct Cycle threshold

*dinB* chromosomal gene used as control

*tetA* plasmid gene used as control
